# Supplementary material
Source: Springer Nature journal article supplement (https://www.springermedizin.de/resource/supplementary/13054_2010_8683_MOESM8_ESM.pdf/9732778)

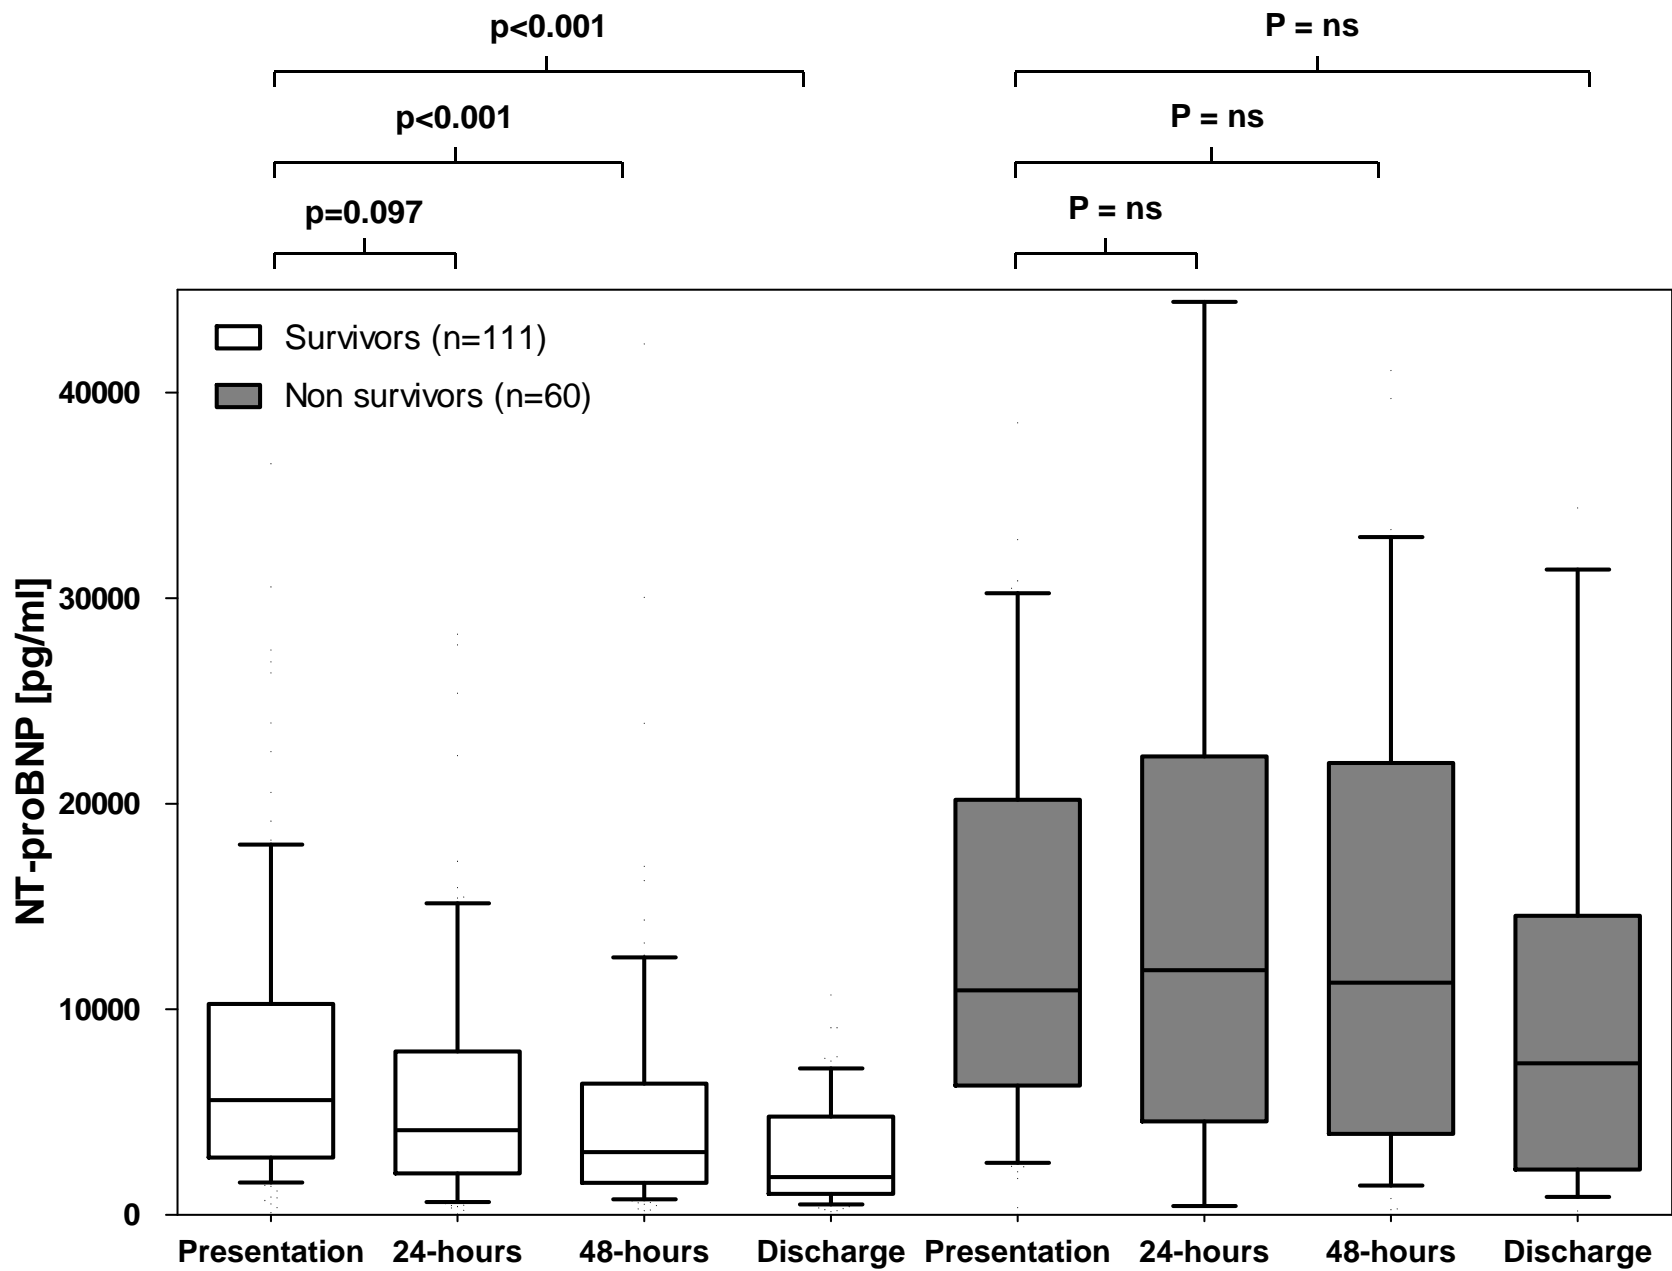

Supplement: MOESM8 [file 9732778]
